# Supplementary material
Source: MDPI journal article supplement (https://www.mdpi.com/1424-8247/15/12/1557)

# Anti-alopecia Activity of Alkaloids Group from Noni Fruit Against Dihydrotestosterone Induced Male Rabbits and Its Molecular Mechanism: *In vivo* and *In silico* Studies

Laila Susanti<sup>1,2\*</sup>, Resmi Mustarichie<sup>1\*</sup>, Eli Halimah<sup>3</sup>, Dikdik Kurnia<sup>4</sup>, Andi Setiawan<sup>5</sup> and Yustinus Maladan<sup>6</sup>

## Supplementary Figures

Supplementary Figures S1. A representative photograph of rabbits shows the extent of alopecia after 17 days of DHT induction.

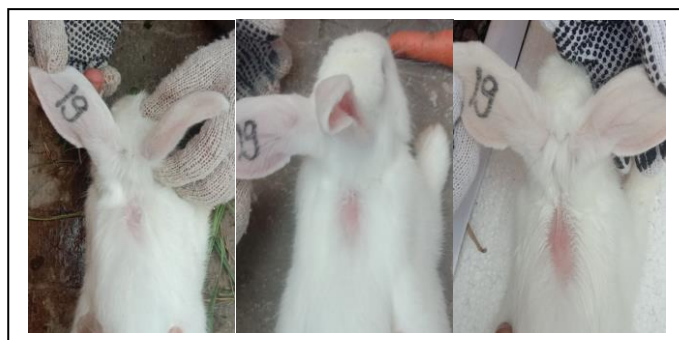

Supplementary Figures S2-S7. The MS chromatogram of FEA-3 sub-fraction

**Figure S2.** Mass spectrum of (E)-3-(1H-Indol-3-yl)acrylonitrile

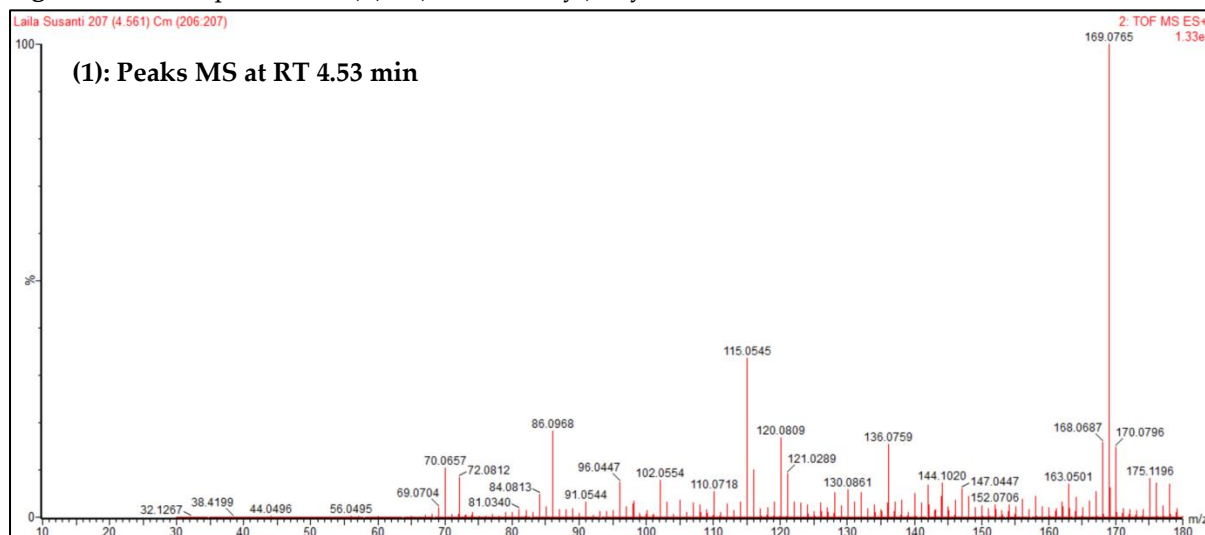

**Figure S3.** Mass spectrum of 1-[4-(2-Hydroxyethyl)-1-piperazinyl]-3-[(2-isopropyl-5-methylcyclohexyl)oxy]-2-propanol

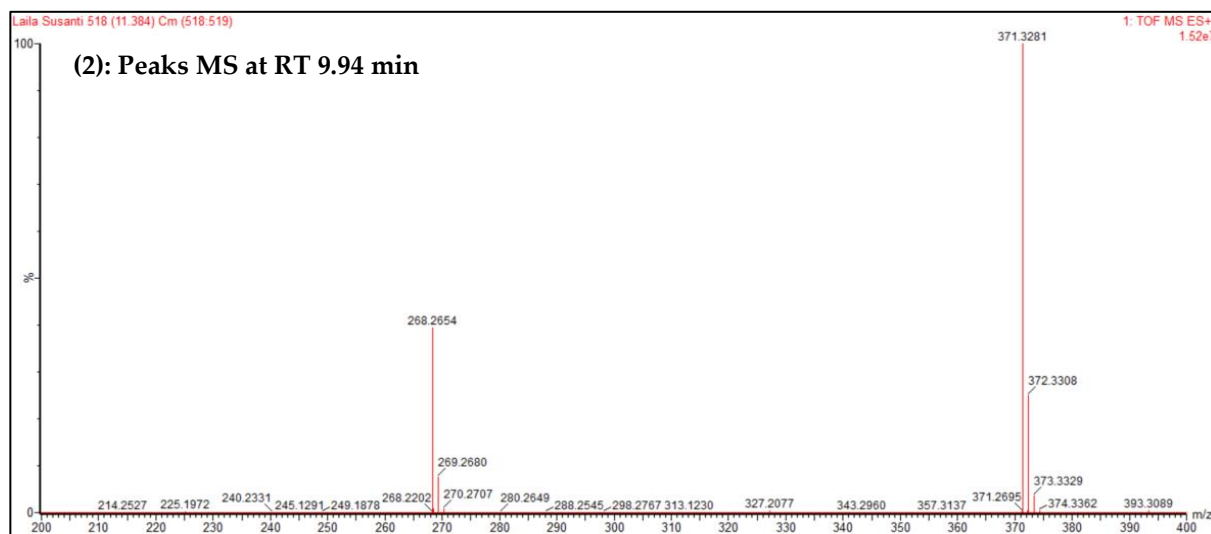

**Figure S4.** Mass spectrum of 11-[(1-Hydroxy-2,2,6,6-tetramethyl-4-piperidinyl)(methyl)amino]undecanoic acid

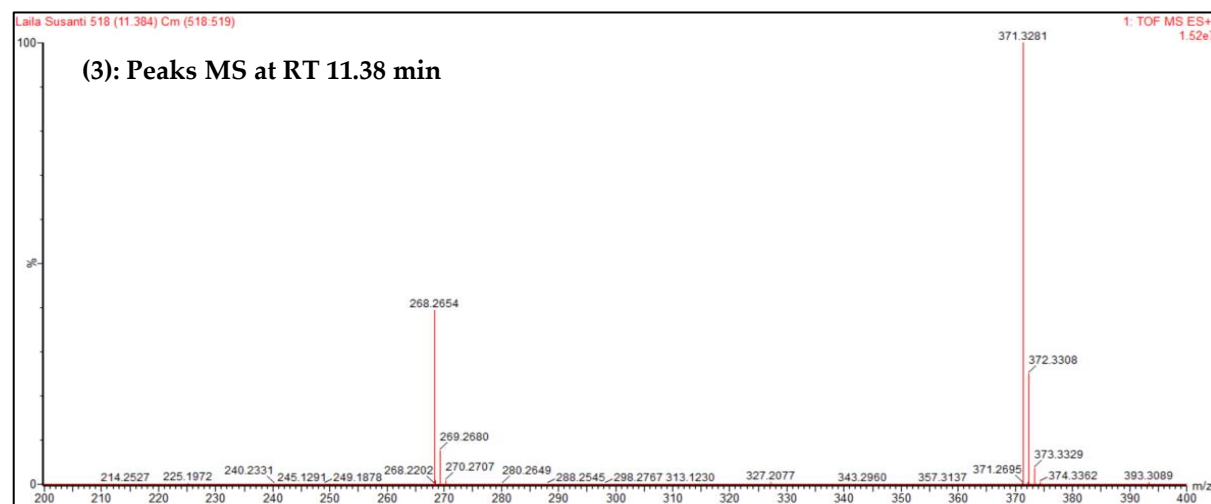

**Figure S5.** Mass spectrum of 2-Methyl-2-propanyl [(3S,4S,6S)-4-hydroxy-6-tridecyl-3-piperidinyl]carbamate

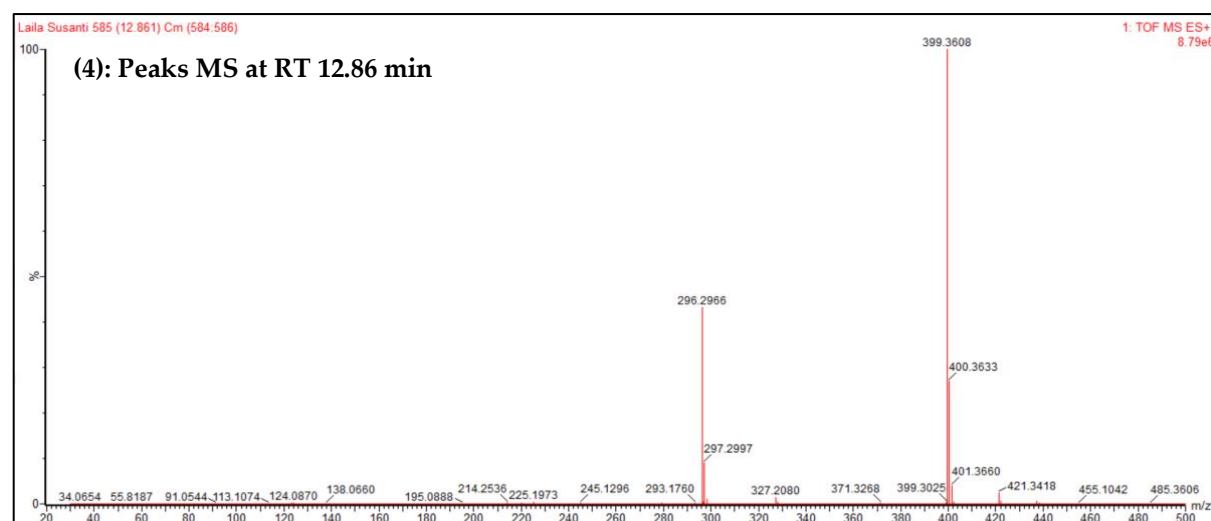

**Figure S6.** Mass spectrum of 3-[3-(Dimethylamino)propyl]-5-[(hexadecyloxy)methyl]-1,3-oxazolidin-2-one

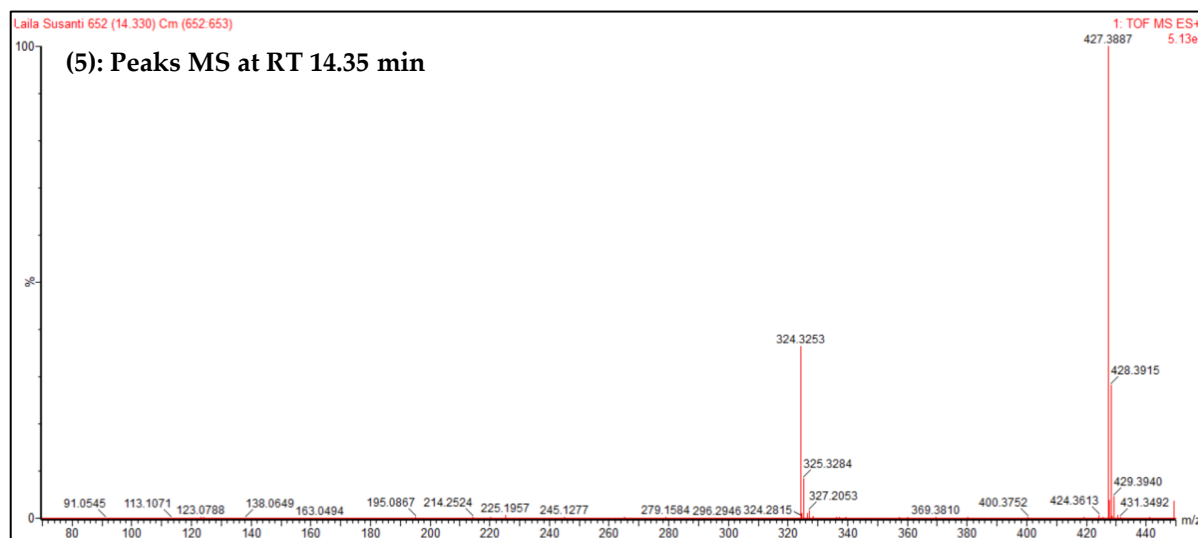

**Figure S7.** Mass spectrum of 2,2',2'',2'''-(4,8-Bis[(3,4-dimethoxybenzyl)amino]pyrimido[5,4-d]pyrimidine-2,6-diyl)dinitrilo)tetraethanol

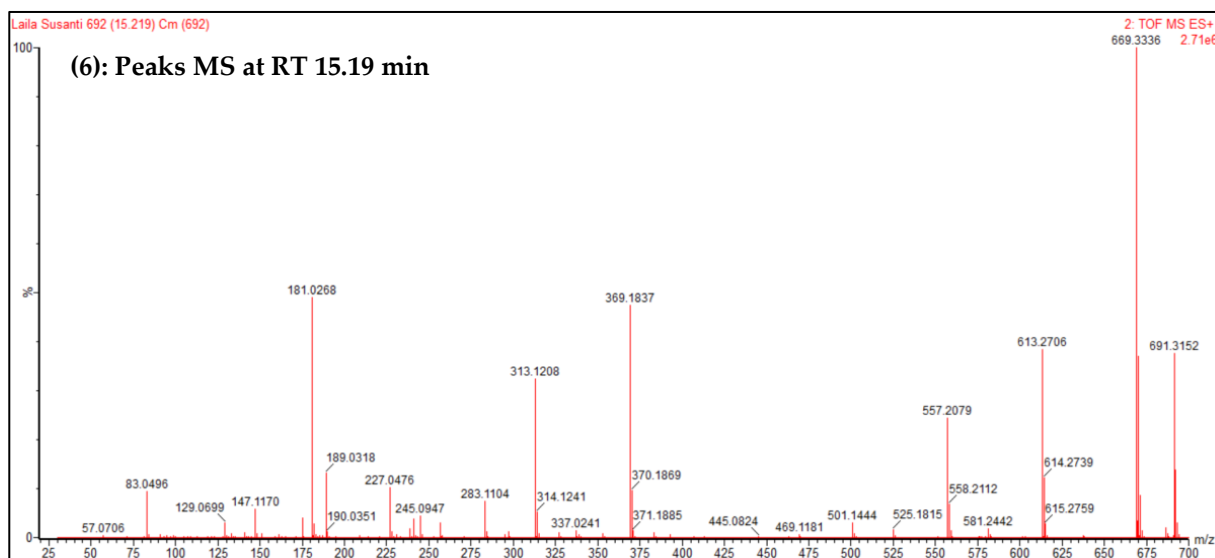

Supplement: s1 [file s1]
